# Supplementary material for: Physical drivers and parameter sensitivities of pearl river-derived sediment dispersal on the Northern South China Sea Shelf: a modeling study
Source: Copernicus journal article supplement (doi:10.5194/os-21-2041-2025), 2025-09-18
Supplement: Supplementary file 1 [file os-21-2041-2025-supplement.pdf]

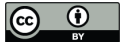

*Supplement of*

**Physical drivers and parameter sensitivities of pearl river-derived sediment dispersal on the Northern South China Sea Shelf: a modeling study**

**Guang Zhang et al.**

*Correspondence to:* Wenping Gong ([gongwp@mail.sysu.edu.cn](mailto:gongwp@mail.sysu.edu.cn))

The copyright of individual parts of the supplement might differ from the article licence.

## 1 **Introduction**

2 This supplementary material provides additional text and figures that support the model  
3 validation and supplementary analyses of model results, which could not be fully  
4 presented in the main article. Sections S1.1 through S1.5 detail the validation process,  
5 including validation metrics and station locations (S1.1), water level validation (S1.2),  
6 wave validation (S1.3), cruise survey validation (S1.4), and mooring validation (S1.5).  
7 Section S2 presents supplementary analyses of the model results.

8

### 9 **S1.1 Model validation metrics and station locations**

10 The model performance was quantified using several metrics, including mean bias,  
11 root-mean-square error (RMSE), and model skill (Willmott, 1981). Bias in model  
12 validation refers to the consistent deviation between model predictions and observed  
13 data, indicating whether the model tends to overestimate or underestimate certain  
14 variables compared to actual measurements. The RMSE quantifies the average  
15 deviation between the model results and the observations. It provides a measure of the  
16 overall accuracy of the model's predictions. Model skill represents the agreement  
17 between the model and the observations. A model skill value of 1 indicates perfect  
18 agreement between the model and the observations, while a value of 0 indicates  
19 complete disagreement. The model skill is calculated as follows:

$$20 \quad SK = 1 - \frac{\sum_{i=1}^N |X_{mod} - X_{obs}|^2}{\sum_{i=1}^N (|X_{mod} - \bar{X}_{obs}| + |X_{obs} - \bar{X}_{obs}|)^2} \quad (S1)$$

21 where  $X_{obs}$  and  $X_{mod}$  are the observation and model results, respectively,  $\bar{X}_{obs}$

22 indicates the average data, and N is the number of observations.

23 For model validation, field observation data from multiple stations were utilized  
24 (Figure S1), including three tidal gauge stations (Quarry Bay, Zhapo, and Qinglan), two  
25 wave measurement stations (W1 and W2), two mooring stations (M1 and M2), and 43  
26 cruise survey stations. The validation primarily focused on key parameters such as  
27 water level, non-tide residual water level, significant wave height, current velocity,  
28 salinity, temperature, and suspended sediment concentration at these stations (Figures  
29 S2–S10). A detailed validation and analysis of these parameters are provided in the  
30 subsequent sections of this supplement.

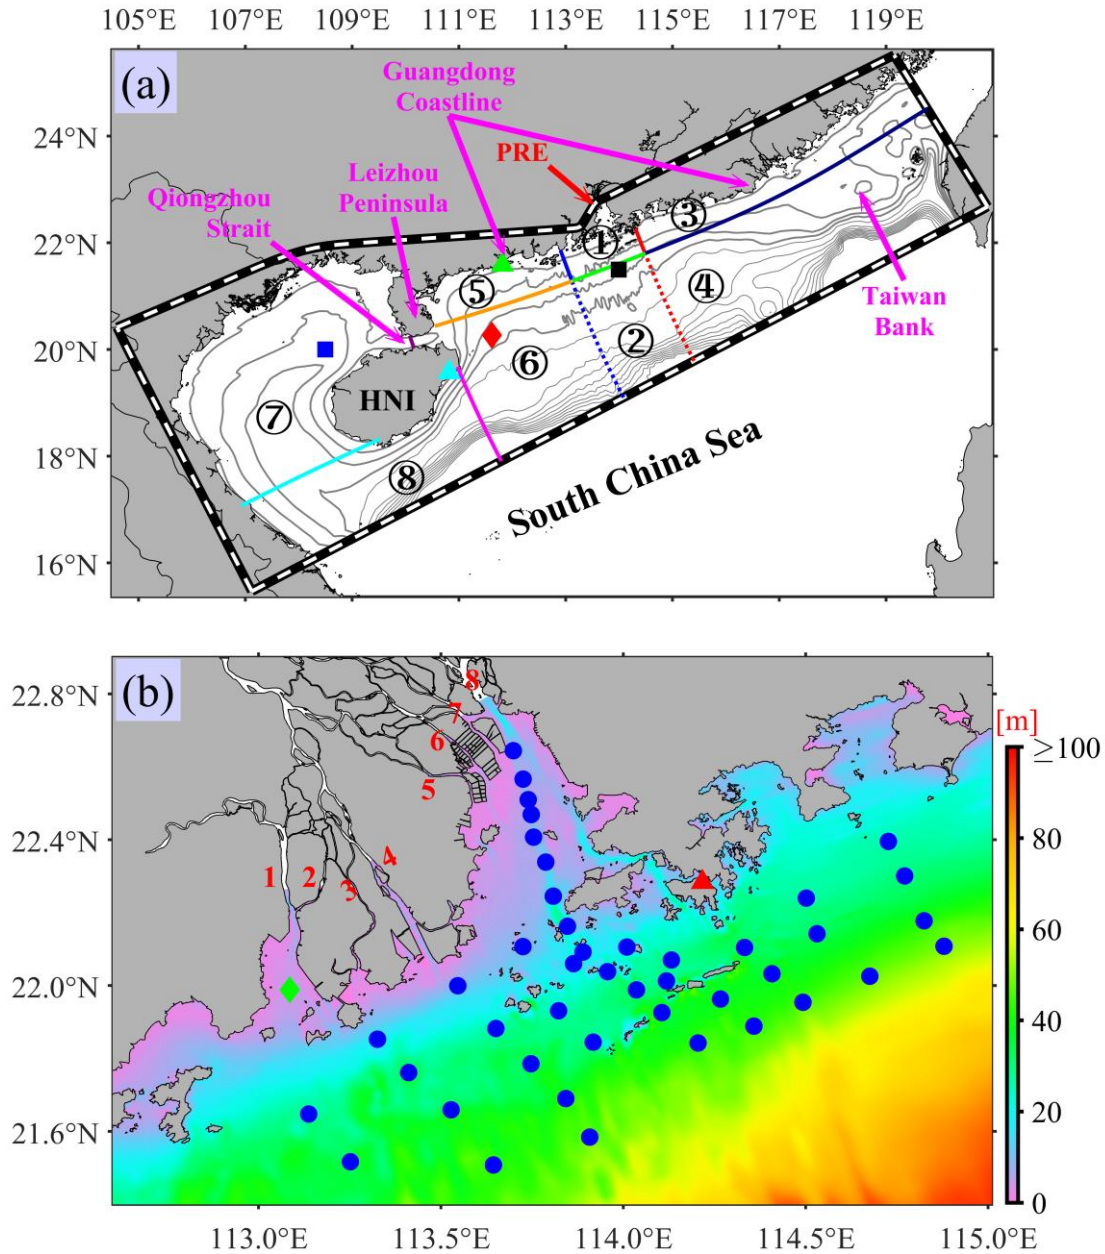

31

32 **Figure S1.** (a) Bathymetry contours and the model grid domain (black to white dashed  
 33 lines), with circled numbers ①-⑧ indicating the eight regions: Proximal, Southern,  
 34 Eastern, Southeastern, Western, Southwestern, Gulf, and Distal regions, which are  
 35 delineated by transects and are described in detail in Section 4.2 of the main text. Thick  
 36 gray contour lines mark the 20 to 80 m isobaths at 20 m intervals, while thin gray lines  
 37 indicate the 100 to 1000 m isobaths at 100 m intervals. The abbreviations HNI and PRE  
 38 refer to Hainan Island and the Pearl River Estuary, respectively. (b) A detailed  
 39 bathymetry map of the PRE and nearby waters. In panel (a), observation stations are

40 marked by green and cyan triangles (Zhapo and Qinglan tidal gauge stations), black and  
41 blue squares (W1 and W2 wave stations), and a red diamond (M2 station), respectively.  
42 In panel (b), stations are represented by: a red triangle (Quarry Bay water level station),  
43 a green diamond (M1 station in the PRE), and blue dots (43 cruise survey stations),  
44 respectively. The red numbers 1-8 indicate the eight outlets of the PRE, where  
45 freshwater and sediment from the Pearl River (specifically the fourth and fifth sediment  
46 sizes listed in Table 1 of the main article) are discharged into the estuary.

47

## 48 **S1.2 Water level validations**

49 Water level observations were carried out at three tidal gauge stations: Quarry Bay,  
50 Zhapo, and Qinglan (Figures S1a-b), during distinct monitoring periods. Observations  
51 at Quarry Bay were conducted from April 1, 2017 to March 31, 2018, while those at  
52 Zhapo and Qinglan took place from January 1 to December 31, 2022. These stations  
53 were strategically located across different geographical zones relative to the Pearl River  
54 Estuary (PRE). Quarry Bay was situated in the proximal region adjacent to the PRE,  
55 while Zhapo and Qinglan were positioned in the "Western" and "Distal" regions,  
56 respectively, both located at greater distances from the PRE. Model performance was  
57 evaluated through comprehensive validation against the year-long observational  
58 records from all three stations (Figures S2-S4), comparing water level and non-tidal  
59 residual components. For water level simulations, the model achieves remarkable  
60 agreement with observations across all stations, showing RMSE below 0.26 m and skill  
61 scores surpassing 0.96. Particularly noteworthy is the model's performance in  
62 predicting non-tidal residuals, which exhibits exceptional accuracy with RMSE values

63 maintained under 0.11 m and skill scores consistently exceeding 0.91.

64

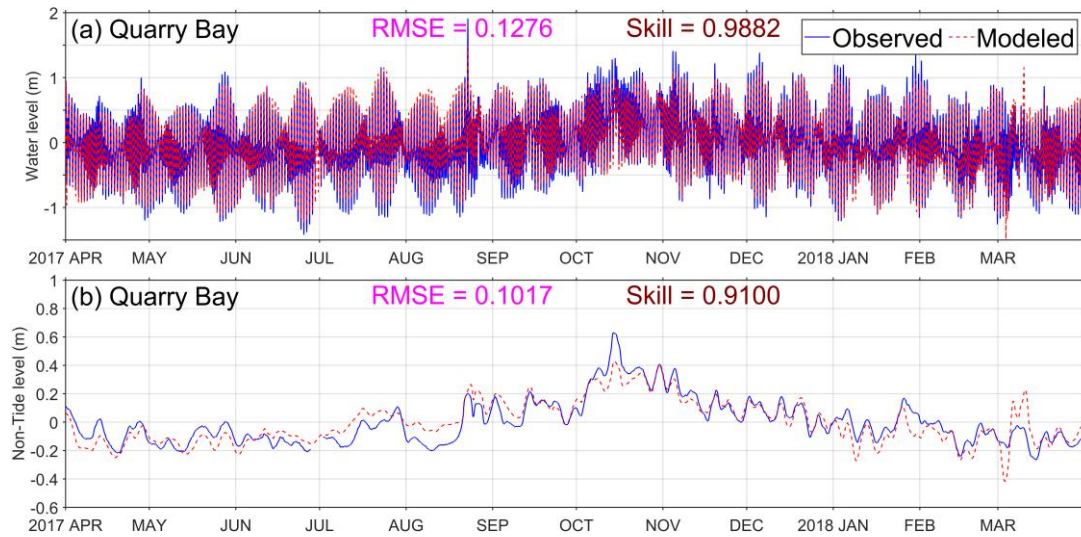

65

66 **Figure S2.** The validations of (a) water level and (b) non-tide level at Quarry Bay

67 station.

68

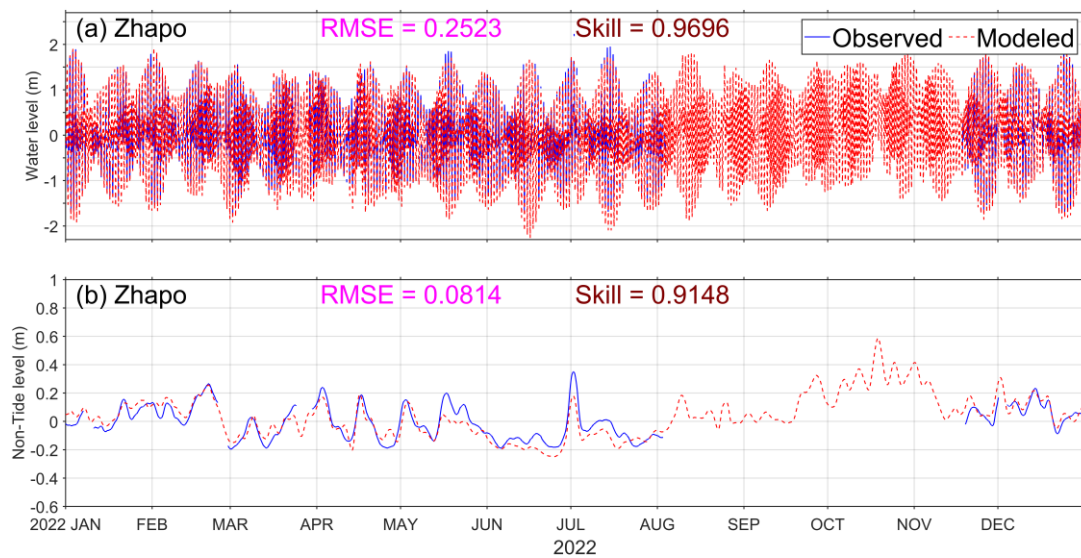

69

70 **Figure S3.** The validations of (a) water level and (b) non-tide level at Zhapo station.

71

72

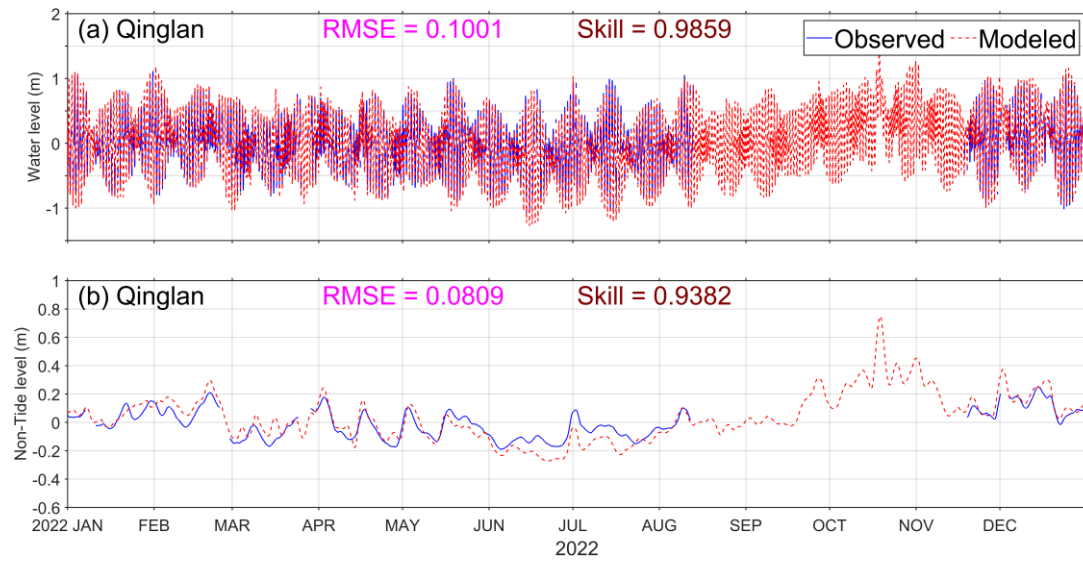

73

74 **Figure S4.** The validations of (a) water level and (b) non-tide level at Qinglan station.

75

### 76 **S1.3 Wave validations**

77 Wave data were collected at two monitoring stations (W1 and W2; Figure S1a)

78 during two distinct periods: November 1 to December 31, 2009, and October 2 to 8,

79 2023, respectively. Station W1 was positioned in the "Southern" region, close to the

80 PRE, while Station W2 was located in the Beibu Gulf, at a greater distance from the

81 PRE (Figure S1a). The observed significant wave heights were validated against model

82 simulations (Figures S5-S6). The model demonstrated excellent agreement with

83 observations, achieving skill scores above 0.93 and RMSE values below 0.29 m at

84 station W1, and skill scores exceeding 0.98 with an RMSE of 0.16 m at station W2.

85

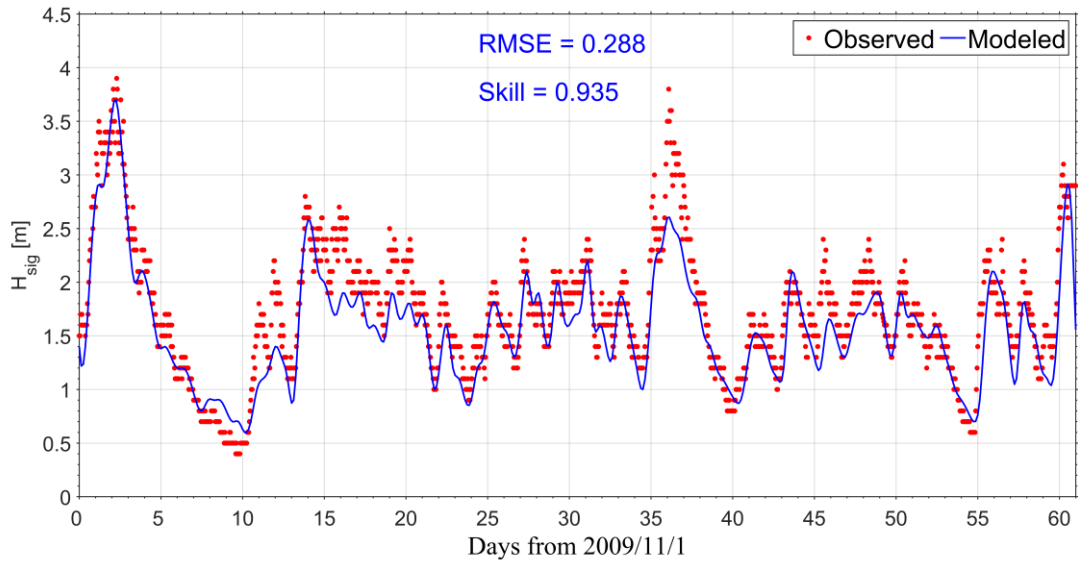

86

87 **Figure S5.** The validations of significant wave height at the W1 station.

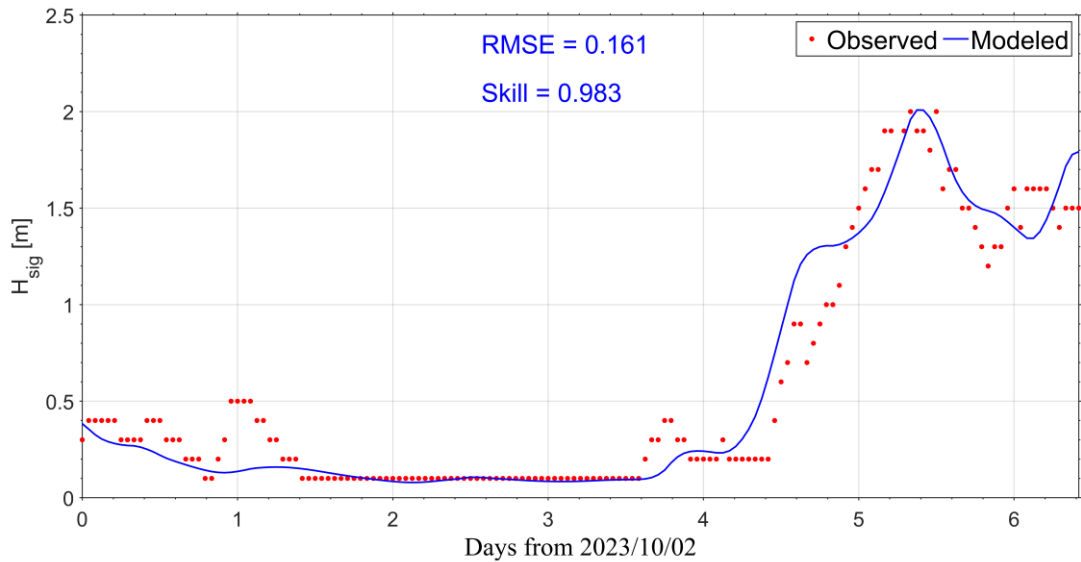

88

89 **Figure S6.** The validations of significant wave height at the W2 station.

90

91 **S1.4 Cruise survey validations**

92 From August 1st to 7th, 2017, Sun Yat-sen University (SYSU) conducted a cruise  
 93 survey that covered the PRE and its adjacent waters on the inner shelf (Figure S1b),  
 94 from onboard the R/V Changhe Ocean (Chen et al., 2019; Zhang et al., 2021b). During  
 95 this period, CTD (Conductivity, Temperature, Depth) data were collected at 43 stations



96 (Figure S1b). These CTD measurements provided temperature and salinity profiles at  
97 various depths for each station. Additionally, surface water samples were taken and  
98 filtered to obtain SSC in the surface layer. These field data were collected to verify the  
99 accuracy of the model's predictions of salinity, temperature, and SSC. Figure S7  
100 presents the comprehensive validation results of salinity, temperature, and SSC at 43  
101 stations during the SYSU cruise survey.

102

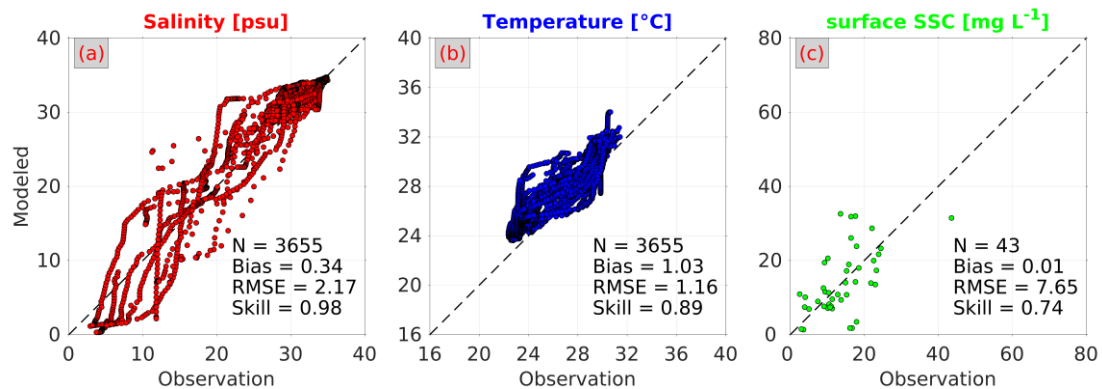

103

104 **Figure S7.** The validations of (a) salinity, (b) temperature, and (c) surface SSC at the  
105 43 stations during the 2017 SYSU cruise survey.

106

107 Salinity validation exhibits excellent agreement, with a bias of merely 0.34 psu,  
108 an RMSE of 2.17 psu, and a skill value of 0.98. Temperature validation also shows  
109 relatively good performance, with both bias and RMSE at 1 degree Celsius, along with  
110 a skill value of 0.89. The validation of SSC yields reasonably good results. The small  
111 bias suggests an accurate magnitude in the model simulation. However, the RMSE of  
112 7.65 mg L<sup>-1</sup> indicates a slight deficiency in the model's capability to reproduce SSC  
113 variations over space. Nevertheless, the skill value of 0.74 indicates that the model

114 results remain well representative of the observed data.

### 115 **S1.5 Mooring validations**

116 From August 16 to 21, 2017, Liu et al. (2023) conducted a continuous 115-hour  
117 observation at the M1 station in the PRE (Figure S1b) and obtained data such as flow  
118 velocity, salinity, and SSC. We utilized these publicly available data to validate our  
119 model, as depicted in Figure S8.

120

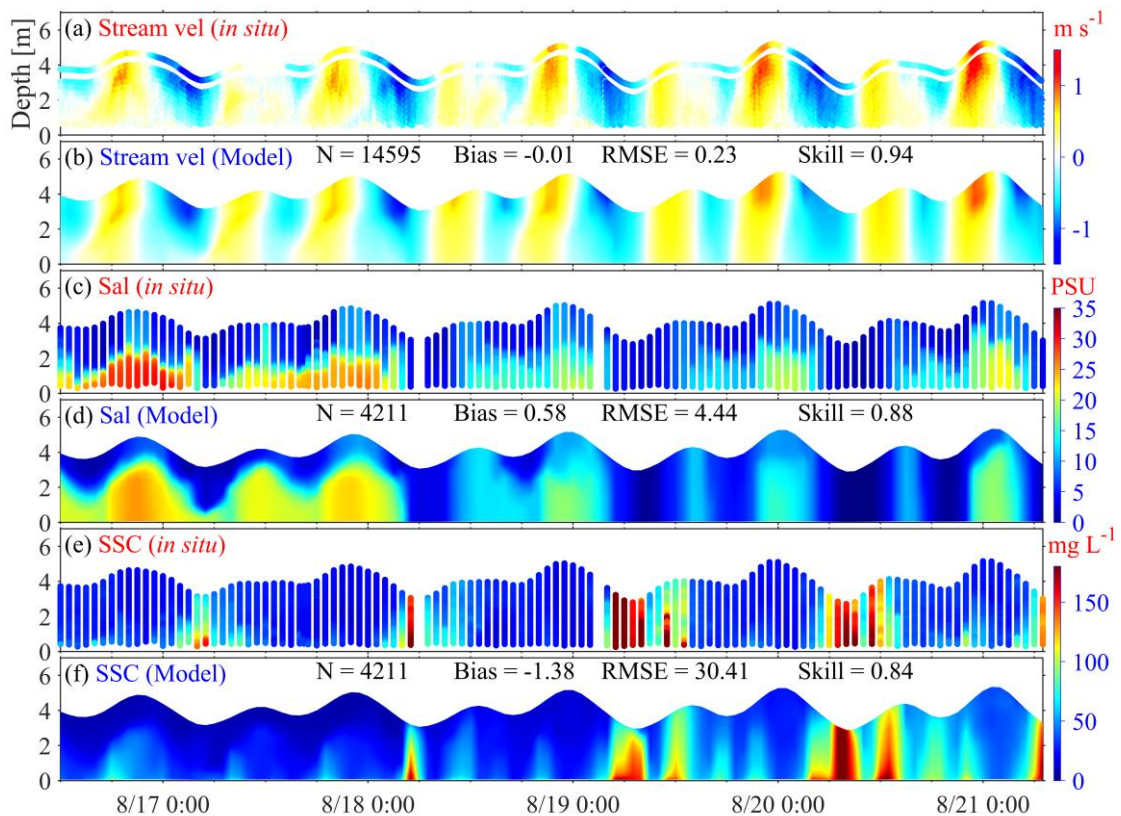

121

122 **Figure S8.** The validations of flow velocity, salinity, and suspended sediment  
123 concentration (SSC) of seawater at station M1, whose location is shown in Figure S1b.

124 Rows 1, 3, and 5 display the observed data, while Rows 2, 4, and 6 showcase the  
125 corresponding model results.

126 The flow velocity validation demonstrates excellent agreement, with minimal bias

127 and RMSE, and a skill value exceeding 0.9. Salinity validation also exhibits relatively  
128 good performance, with a small bias and a skill value of 0.87. However, the RMSE  
129 exceeding 4 psu suggests that the accuracy of the seabed topography may be limited.  
130 The validation of SSC produces reasonably good results, with a small bias indicating  
131 accurate magnitude in the model simulation. Nevertheless, the RMSE of 30.4 mg L<sup>-1</sup>  
132 suggests a slight deficiency in the model's ability to replicate SSC variations over time.  
133 Nonetheless, the skill value of 0.84 indicates that the model results remain well  
134 representative of the observed data.

135 To validate the flow velocity of our model in regions distal to the Pearl River  
136 Estuary, we employed mooring data from the M2 station as reported by [Li et al. \(2024\)](#).  
137 M2 station is located in the southwestern region, and its specific position, at 111.62°E  
138 and 20.27°N, can be seen in Figure S1a. The data were collected by a 300 kHz upward-  
139 looking ADCP, with a vertical resolution of 2 m and a sampling interval of 10 minutes.  
140 The data collection period spanned from January 16, 2021, to February 22, 2021. The  
141 comparison between the observations and model results is shown in Figure S9  
142 (eastward current) and Figure S10 (northward current). It is evident that the northward  
143 current is significantly larger than the eastward current, which is influenced by the  
144 topography, and the tidal signal of the northward current is very prominent. Our model  
145 results are in good agreement with the observations, with SK values of 0.90 (Figure S9)  
146 and 0.94 (Figure S10), respectively.

147

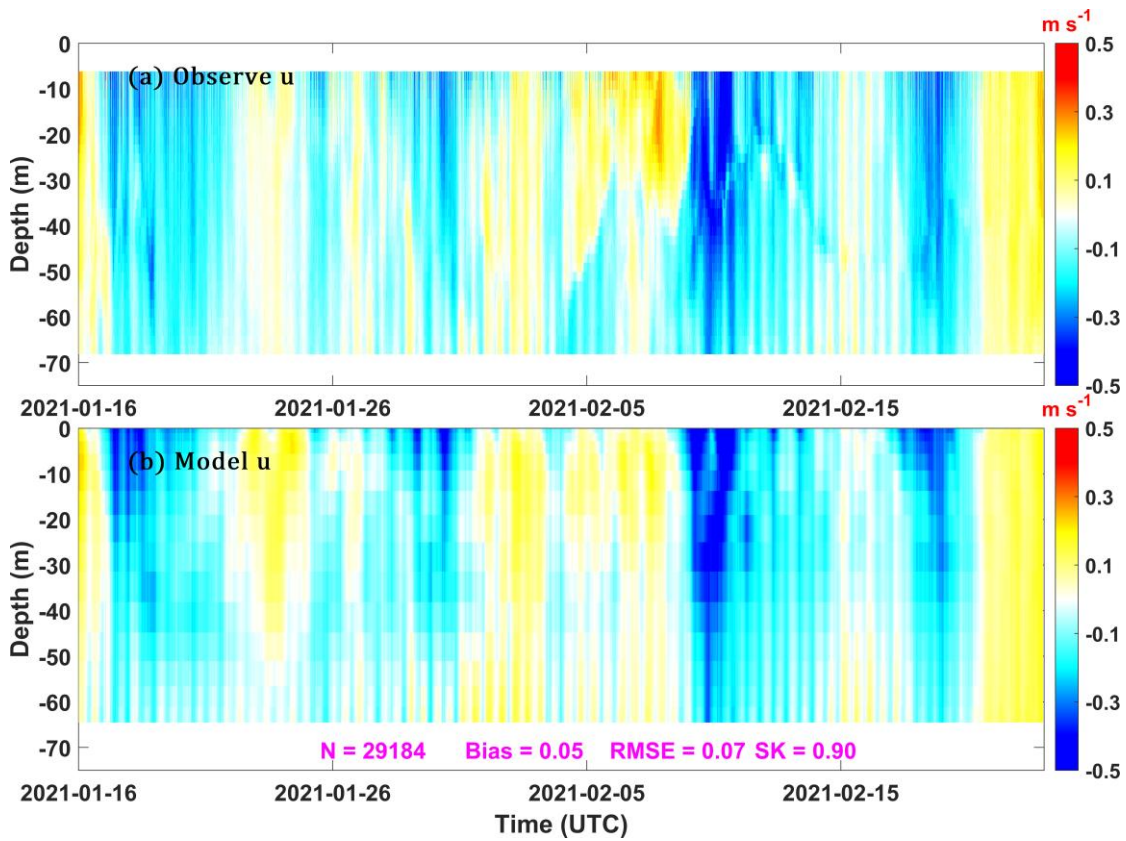

148

149 **Figure S9.** (a) Observed and (b) simulated eastward current velocity at M2 station.

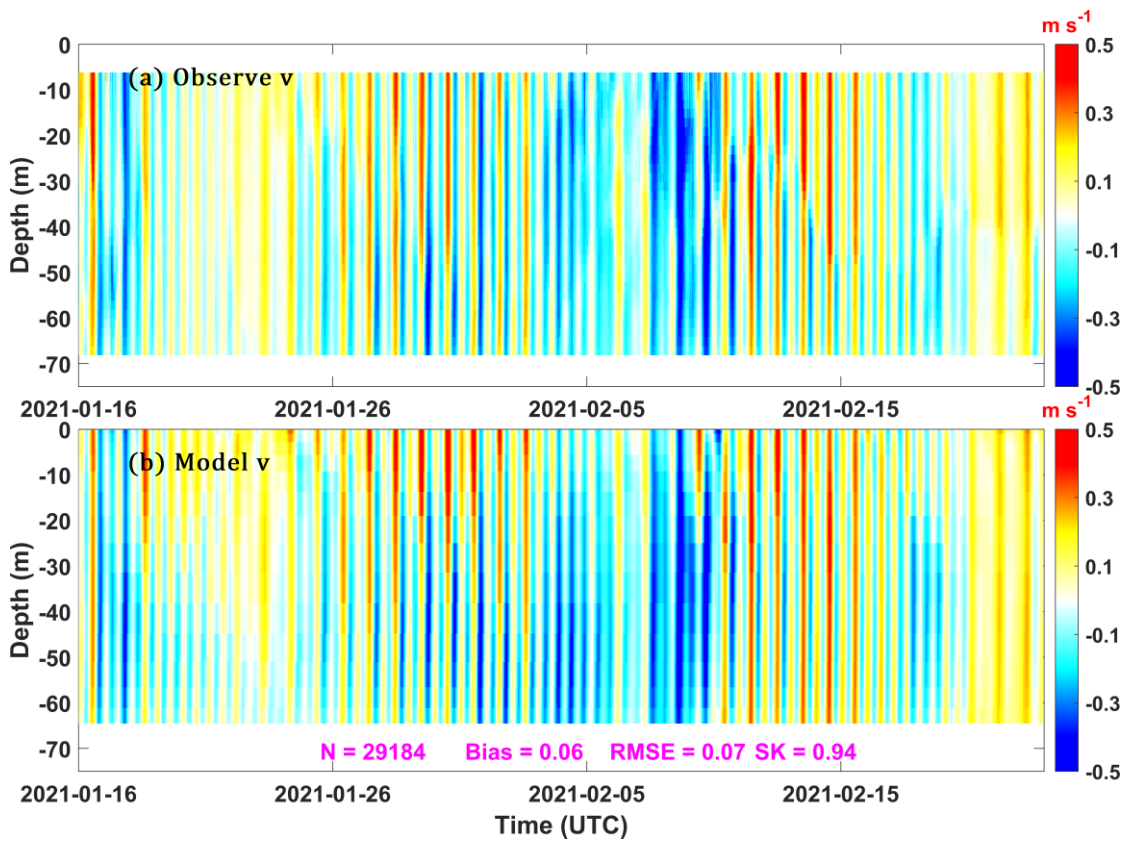

150

151 **Figure S10.** (a) Observed and (b) simulated northward current velocity at M2 station.

## 152 **S2 Supplementary analyses of the model results**

153       Furthermore, although the initial bed sediment grain size distribution we obtained  
154 by considering the seasonal variation of critical shear stress for erosion is quite close to  
155 the initial prototype, there are still some differences (Figures 2d-f vs. 2g-i). Additionally,  
156 the lack of in situ grain size distributions in part of the model domain (especially in the  
157 Beibu Gulf) may also introduce some uncertainties in sediment transport there. Does  
158 the spin-up duration of seabed sediments have a significant impact on the model results?  
159 It should be noted that here we are not referring to the distribution proportion of riverine  
160 sediments on the bed. To address this question, we designed a new experiment (Cycle2).  
161 We used the end state of the Control run on March 31, 2018, as the initial conditions  
162 for Cycle2. However, different from the Cycle case, in Cycle2, we changed both Class  
163 1 and Class 4 sediments in the bed and water column at the end state of the Control run  
164 to Class 1, and both Class 2 and Class 5 sediments to Class 2. That is, there were no  
165 pre-existing Pearl River-derived sediments in the model domain when Cycle2 started.  
166 The results of Cycle2 show that the retention in the "Proximal" and "Western" regions  
167 decreased by 0.13% and 0.03% of the annual riverine sediment load, respectively, while  
168 the retention in the "Eastern", "Southeastern", "Southern", "Southwestern", "Gulf", and  
169 "Distal" regions increased by 0.03%, 0.03%, 0.01%, 0.02%, 0.07%, and 0.01%,  
170 respectively. This suggests that uncertainty in seabed sediment spin-up duration has a  
171 relatively minor impact.

172       We employ the COAWST model, which uses an S-coordinate system in the vertical  
173 direction with increased resolution near the surface and bottom layers ([Song and](#)

174 [Haidvogel, 1994](#)). This vertical layering allows cell heights to vary, enabling finer  
175 resolution in dynamically important regions and improving performance in areas with  
176 sloping bathymetry compared to traditional sigma-coordinate systems ([Bryan, 1969](#);  
177 [Song and Haidvogel, 1994](#)). In addition, our model includes horizontal grid refinement  
178 in the PRE, enhancing its ability to resolve estuarine features.

179 Our model effectively captures estuarine turbidity maxima (ETM) and horizontal  
180 salinity fronts (Figures S11 and S12). During summer, multiple ETMs appear near the  
181 estuary bottom (Figure S11b), and while these features persist in winter, their  
182 concentrations vary (Figure S12b), consistent with the findings of [Wang et al. \(2018\)](#),  
183 [Zhan et al. \(2019\)](#), [Zhang et al. \(2021a\)](#), [Ma et al. \(2022\)](#), and [Ma et al. \(2024\)](#).  
184 Horizontal salinity fronts (Regions where the horizontal salinity gradient magnitude  
185 (SGM) exceeds  $1.5 \text{ psu km}^{-1}$ ) are also well represented, showing an upstream shift from  
186 the high-discharge summer season to the low-discharge winter season (Figures S11e–f  
187 and S12e–f), in agreement with previous studies by [Zhang et al. \(2021a\)](#)  
188 and [Ma et al. \(2024\)](#).

189 The fronts in estuaries always exhibit high convergence of currents in their vicinity  
190 ([Geyer and Ralston, 2015](#)), and thus exert a great influence on sediment transport and  
191 trapping ([Ralston et al., 2012](#)). One important trapping mechanism is the near-bottom  
192 velocity convergence caused by the longitudinal or lateral gradients in the baroclinic  
193 pressure gradient, which creates regions of estuarine turbidity maxima and high  
194 deposition ([Meade, 1969](#); [Burchard and Baumert, 1998](#); [Burchard et al., 2018](#)). The  
195 surface frontal zone always exhibits flow convergence with significant downwelling or

196 sinking flow ([Garvine and Monk, 1974](#); [O'Donnell et al., 1998](#); [Marmorino and Trump,](#)  
197 [2000](#)), which favors sediment settling and deposition there.

198       Within the PRE, pronounced horizontal salinity gradients exist between channels  
199 and shoals, as well as between the estuary and the shelf (Figures S11e–f and S12e–f).  
200 These gradients facilitate significant trapping of Pearl River–derived sediment near the  
201 estuary, particularly on the estuarine shoals and at the river mouth ([Zhang et al., 2019](#)).  
202 During winter, the Pearl River's freshwater discharge is low and comes mainly from  
203 the western outlets ([Wong et al., 2003b](#)). Furthermore, the Coriolis force and the  
204 downwelling-favorable wind steer freshwater toward the western shore ([Wong et al.,](#)  
205 [2003b](#); [Lai et al., 2016](#)). The convergence between the seaward diluted water and the  
206 saline coastal water establishes a strong salinity front along the western shore, where  
207 the strongest seaward flow exists ([Wong et al., 2003a](#)). In winter, the upstream and  
208 northwestward migration of salinity fronts enhances the lateral trapping of sediment on  
209 the West shoal of the Pearl River Estuary ([Zhang et al., 2021a](#)).

210

211

Wet summer season (2017.4.1-2017.9.30)

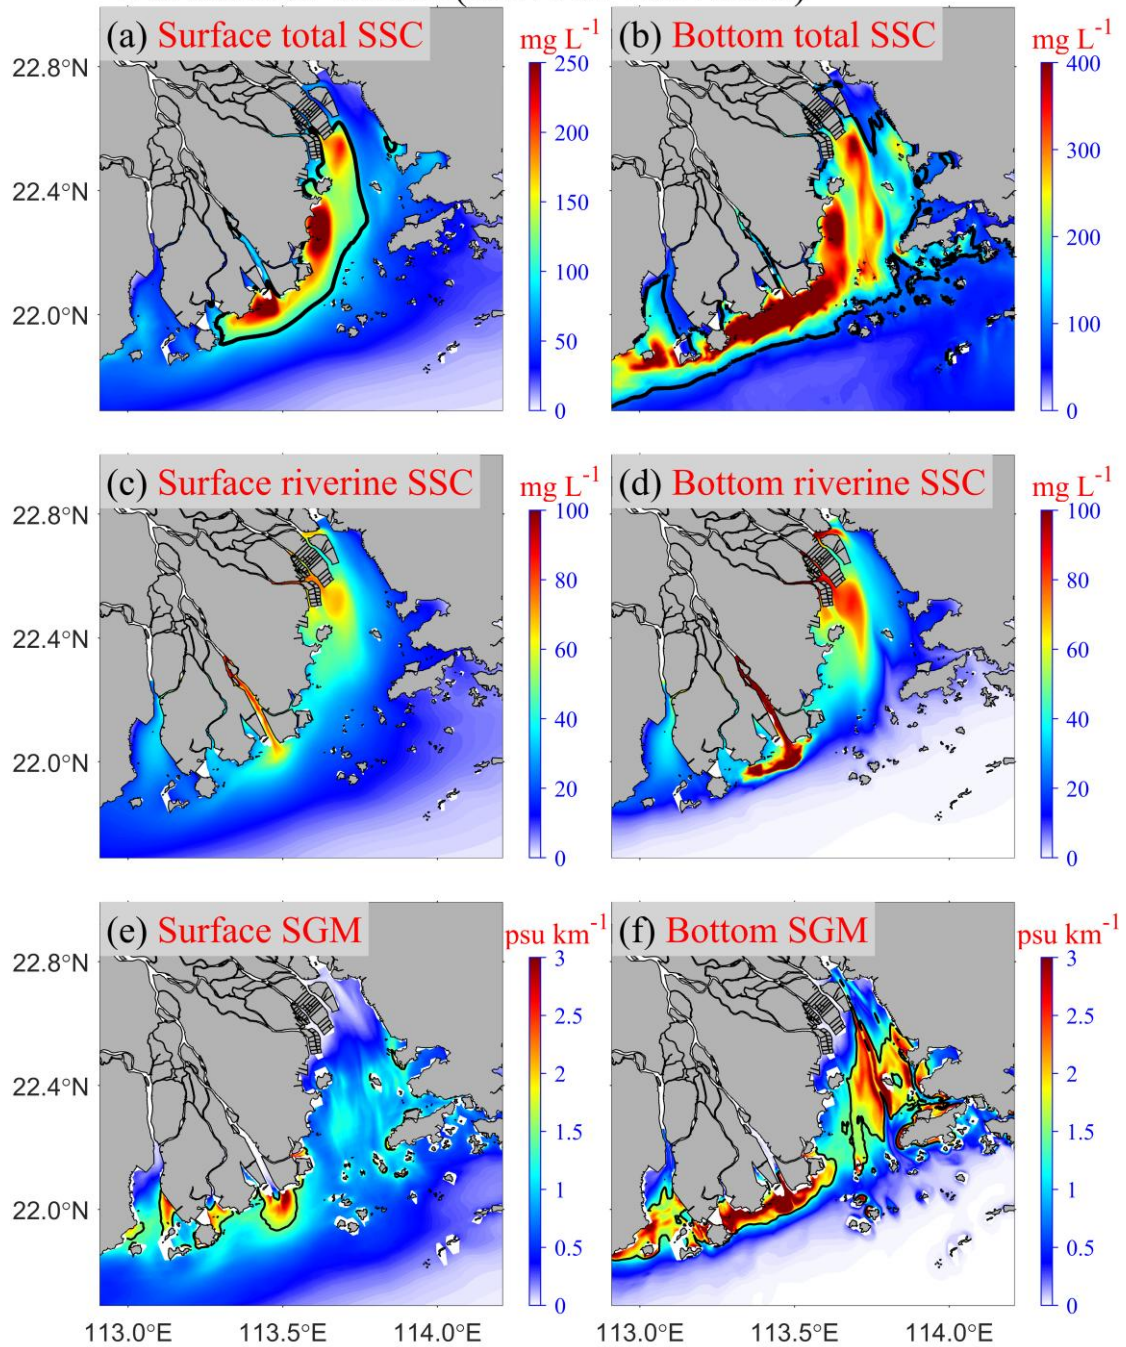

212

213 **Figure S11.** Summer-averaged (a–b) total suspended sediment concentration (classes

214 1–5 in Table 1) and the black lines mark the 100  $\text{mg L}^{-1}$  contours, (c–d) Pearl River–

215 derived suspended sediment concentration (classes 4–5 in Table 1), and (e–f) horizontal

216 salinity gradient magnitude (SGM) and the black lines mark the 1.5  $\text{psu km}^{-1}$  contours.

217 Columns 1 and 2 represent surface and bottom layers, respectively.



Dry winter season (2017.10.1-2018.3.31)

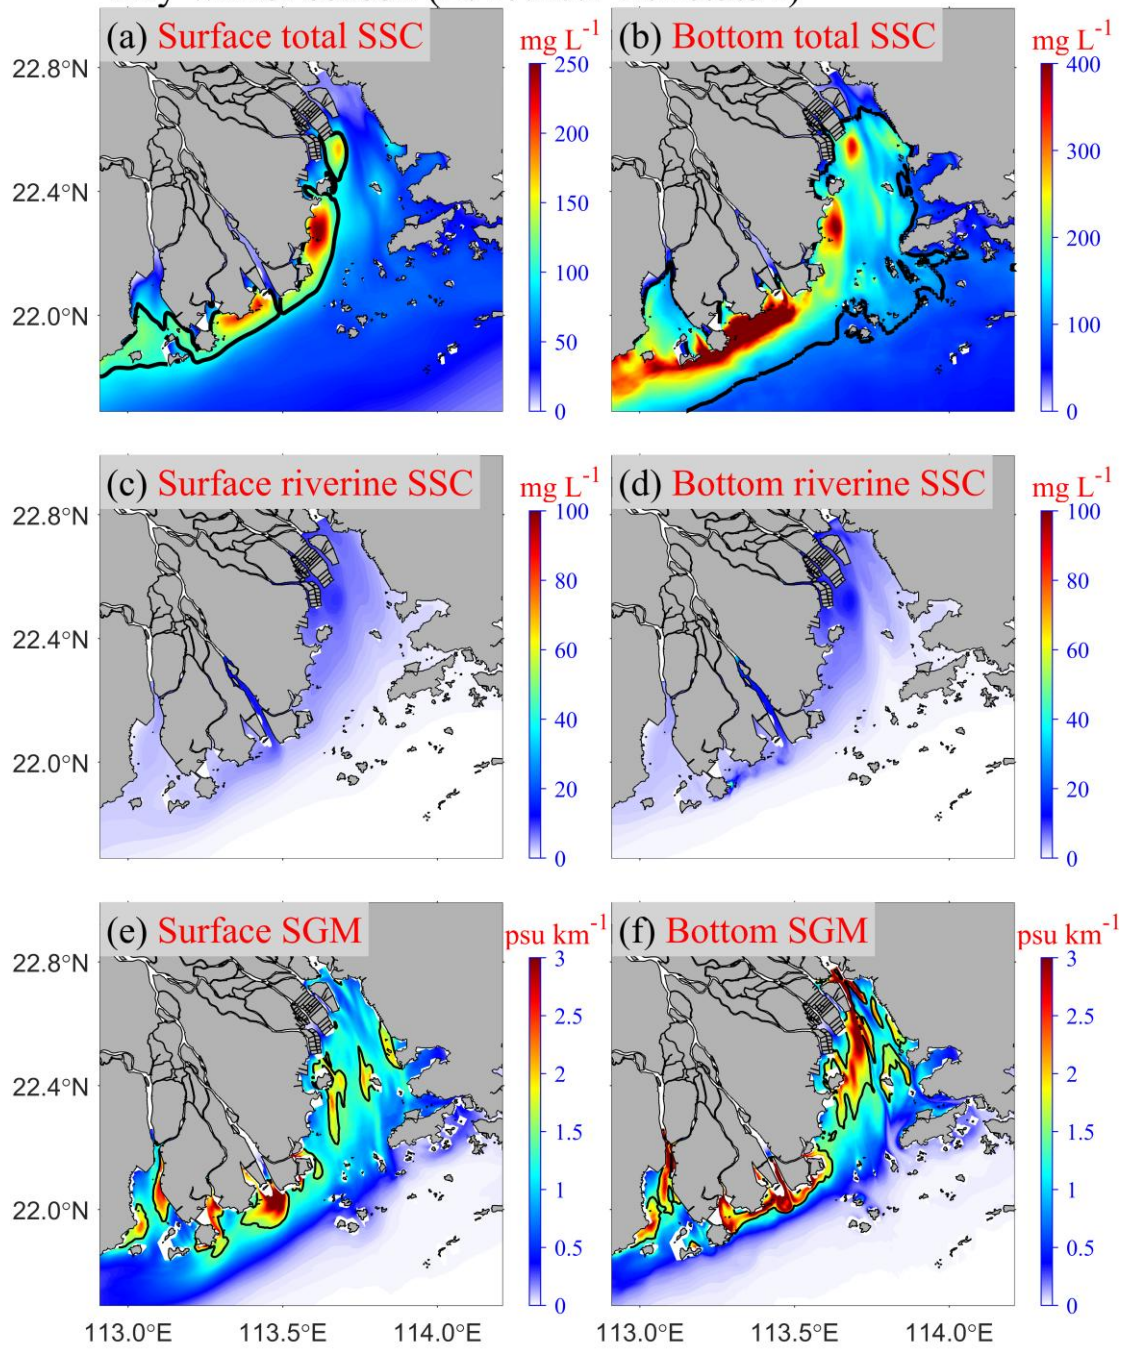

219

220 **Figure S12.** Same as Figure S11, but for winter-averaged ones.

221

222

223

224 **References**

- 225 Bryan, K., 1969. A numerical method for the study of the circulation of the world ocean. *Journal of*  
226 *Computational Physics* 4, 347-376.
- 227 Burchard, H., Baumert, H., 1998. The Formation of Estuarine Turbidity Maxima Due to Density Effects  
228 in the Salt Wedge. A Hydrodynamic Process Study. *Journal of Physical Oceanography* 28, 309-321.
- 229 Burchard, H., Schuttelaars, H.M., Ralston, D.K., 2018. Sediment Trapping in Estuaries. *Annual Review*  
230 *of Marine Science* 10, 371-395.
- 231 Chen, Y., Chen, L., Zhang, H., Gong, W., 2019. Effects of wave-current interaction on the Pearl River  
232 Estuary during Typhoon Hato. *Estuarine, Coastal and Shelf Science* 228, 106364.
- 233 Garvine, R.W., Monk, J.D., 1974. Frontal structure of a river plume. *Journal of Geophysical Research*  
234 79, 2251-2259.
- 235 Geyer, W.R., Ralston, D.K., 2015. Estuarine Frontogenesis. *Journal of Physical Oceanography* 45, 546-  
236 561.
- 237 Lai, Z., Ma, R., Huang, M., Chen, C., Chen, Y., Xie, C., Beardsley, R.C., 2016. Downwelling wind, tides,  
238 and estuarine plume dynamics. *Journal of Geophysical Research: Oceans* 121, 4245-4263.
- 239 Li, J., Li, M., Xie, L., 2024. Observations of near-inertial oscillations trapped at inclined front on  
240 continental shelf of the northwestern South China Sea. *EGUsphere* 2024, 1-25.
- 241 Liu, H., Ye, L., Zhou, W., Wu, J., 2023. Salt-wedge intrusion-retreat cycle induced sediment flocculation  
242 dynamics in bottom boundary layer (BBL) of a micro-tidal estuary. *Marine Geology* 466, 107175.
- 243 Ma, C., Zhao, J., Ai, B., Sun, S., Yang, Z., 2022. Machine Learning Based Long-Term Water Quality in  
244 the Turbid Pearl River Estuary, China. *Journal of Geophysical Research: Oceans* 127.
- 245 Ma, M., Porz, L., Schrum, C., Zhang, W., 2024. Physical mechanisms, dynamics and interconnections of  
246 multiple estuarine turbidity maximum in the Pearl River estuary. *Frontiers in Marine Science*  
247 Volume 11 - 2024.
- 248 Marmorino, G.O., Trump, C.L., 2000. Gravity current structure of the Chesapeake Bay outflow plume.  
249 *Journal of Geophysical Research: Oceans* 105, 28847-28861.
- 250 Meade, R.H., 1969. Landward Transport of Bottom Sediments in Estuaries of the Atlantic Coastal Plain.  
251 *Journal of Sedimentary Petrology* 39, 222-234.
- 252 O'Donnell, J., Marmorino, G.O., Trump, C.L., 1998. Convergence and Downwelling at a River Plume

253 Front. Journal of Physical Oceanography 28, 1481-1495.

254 Ralston, D.K., Geyer, W.R., Warner, J.C., 2012. Bathymetric controls on sediment transport in the  
255 Hudson River estuary: Lateral asymmetry and frontal trapping. *Journal of Geophysical Research:*  
256 *Oceans* 117.

257 Song, Y., Haidvogel, D., 1994. A Semi-implicit Ocean Circulation Model Using a Generalized  
258 Topography-Following Coordinate System. *Journal of Computational Physics* 115, 228-244.

259 Wang, C., Li, W., Chen, S., Li, D., Wang, D., Liu, J., 2018. The spatial and temporal variation of total  
260 suspended solid concentration in Pearl River Estuary during 1987-2015 based on remote sensing.  
261 *Science of The Total Environment* 618, 1125-1138.

262 Willmott, C.J., 1981. On the Validation Of Models. *Physical Geography* 2, 184-194.

263 Wong, L.A., Chen, J.C., Xue, H., Dong, L.X., Guan, W.B., Su, J.L., 2003a. A model study of the  
264 circulation in the Pearl River Estuary (PRE) and its adjacent coastal waters: 2. Sensitivity  
265 experiments. *Journal of Geophysical Research* 108.

266 Wong, L.A., Chen, J.C., Xue, H., Dong, L.X., Su, J.L., Heinke, G., 2003b. A model study of the  
267 circulation in the Pearl River Estuary (PRE) and its adjacent coastal waters: 1. Simulations and  
268 comparison with observations. *Journal of Geophysical Research* 108.

269 Zhan, W., Wu, J., Wei, X., Tang, S., Zhan, H., 2019. Spatio-temporal variation of the suspended sediment  
270 concentration in the Pearl River Estuary observed by MODIS during 2003–2015. *Continental Shelf*  
271 *Research* 172, 22-32.

272 Zhang, G., Chen, Y., Cheng, W., Zhang, H., Gong, W., 2021a. Wave Effects on Sediment Transport and  
273 Entrapment in a Channel-Shoal Estuary: The Pearl River Estuary in the Dry Winter Season. *Journal*  
274 *of Geophysical Research: Oceans* 126.

275 Zhang, G., Cheng, W., Chen, L., Zhang, H., Gong, W., 2019. Transport of riverine sediment from different  
276 outlets in the Pearl River Estuary during the wet season. *Marine Geology* 415, 105957.

277 Zhang, H., Hu, S., Cheng, W., Zhu, L., Chen, Y., Liu, J., Gong, W., Li, Y., Li, S., 2021b. Response of  
278 freshwater transport during typhoons with wave-induced mixing effects in the Pearl River Estuary,  
279 China. *Estuarine, Coastal and Shelf Science* 258, 107439.

280
